# Supplementary material for: A New Look at the Purported Health Benefits of Commercial and Natural Clays
Source: MDPI journal article supplement (doi:10.3390/biom11010058), 2021-01-05
Supplement: s1 [file s1]

Supplementary Table 1. Minimum Inhibitory Concentration (MIC) for Clays A-F.

| Clay   | State | Minimum Inhibitory Concentration |                              |                         |                              |                              |
|--------|-------|----------------------------------|------------------------------|-------------------------|------------------------------|------------------------------|
|        |       | MRSA<br>(g/L)                    | <i>P.aeruginosa</i><br>(g/L) | <i>E. coli</i><br>(g/L) | <i>K. pneumonia</i><br>(g/L) | <i>A. baumannii</i><br>(g/L) |
| Clay A | L     | >300                             | >300                         | -                       | -                            | -                            |
|        | S     | >600                             | >600                         | >600                    | >600                         | >600                         |
| Clay B | L     | >300                             | >300                         | -                       | -                            | -                            |
|        | S     | >600                             | >600                         | >600                    | >600                         | >600                         |
| Clay C | L     | >300                             | >300                         | -                       | -                            | -                            |
|        | S     | >600                             | >600                         | >600                    | >600                         | >600                         |
| Clay D | L     | >300                             | >300                         | -                       | -                            | -                            |
|        | S     | >600                             | >600                         | >600                    | >600                         | >600                         |
| Clay E | L     | >300                             | >300                         | -                       | -                            | -                            |
|        | S     | 75                               | 75                           | 75                      | 150                          | 150                          |
| Clay F | L     | >300                             | >300                         | -                       | -                            | -                            |
|        | S     | >600                             | >600                         | >600                    | >600                         | >600                         |
